1 **Bacterial *Rdl2* dsRNA increased the insecticidal activity of GABAR**  
2 **blockers and allosteric modulators against *Plutella xylostella***

3 Kunkun Wang, <sup>a,b</sup> Benjie Li, <sup>a,b</sup> Ye Yu, <sup>a,b</sup> Jiaqi Wei, <sup>a,b</sup> Jian Zhu, <sup>a,b</sup> Jiali Wang, <sup>a,b</sup> Fei  
4 Lin, <sup>a,b\*</sup> Hanhong Xu, <sup>a,b\*</sup>

5

6 <sup>a</sup>State Key Laboratory for Conservation and Utilization of Subtropical  
7 Agro-bioresources, South China Agricultural University, Guangzhou, Guangdong,  
8 People's Republic of China

9 <sup>b</sup>Key Laboratory of Natural Pesticide and Chemical Biology, Ministry of Education,  
10 South China Agricultural University, Guangzhou, Guangdong, People's Republic of  
11 China

12

13 \*Corresponding Author: E-mail: hhxu@scau.edu.cn (Hanhong Xu) and  
14 resistanc@scau.edu.cn (Fei Lin).

15

16

17

18

19

20

21

22

23 **ABSTRACT**

24 **BACKGROUND:** The application of RNAi to control pests has attracted the  
25 attention of researchers. Our results indicated that knockout of *PxRdl2* can decrease  
26 resistance to fipronil in *Plutella xylostella*, providing a suitable target gene for  
27 RNAi-based pest control.

28 **RESULTS:** The differences in the sensitivity of two established homozygous  
29 knockout strains of *P. xylostella*. (*Rdl1*KO and *Rdl2*KO) and susceptible *P. xylostella*  
30 to a series of compounds were evaluated. Quinazolines and isoxazolines both showed  
31 stronger efficacy in the *Rdl2*KO strain. Therefore, we proposed a method based on the  
32 knockdown of the *P. xylostella Rdl2* gene as a tactic to enhance the toxicity of  
33 quinazolines and isoxazolines. To reduce costs and protect dsRNA against degradation,  
34 we applied a bacterial expression system using the L4440 vector to express *PxRdl2*  
35 dsRNA in HT115 *Escherichia coli*. Transformed bacteria (dsRNA-Bac) fed through  
36 leaves combined with quinazoline and isoxazolines proved to be more effective in  
37 both the susceptible and fipronil-resistant *P. xylostella*.

38 **CONCLUSION:** Our results provide a strategy for the development of novel  
39 insecticide spray formulations containing dsRNA-Bac, which synergize with  
40 insecticide toxins by suppressing *PxRdl2*, reducing the use of pesticides in the field.

41 **Keywords:** *Plutella xylostella*; RNAi; *PxRdl*; resistance management

42

43

44

45 **1 INTRODUCTION**

46 Since RNA interference (RNAi) was first discovered in the nematode *Caenorhabditis*  
47 *elegans*<sup>1</sup>, it has been widely used as a powerful genetic tool for research on various  
48 taxa, including plants, insects, nematodes, bacteria, fungi, ect.<sup>2,3</sup>. RNAi has been  
49 considered a new generation of pest control technology because it has great  
50 advantages, such as safety for nontarget organisms and the ability to maintain  
51 pollution-free conditions. Although dsRNA injected directly into an organism is  
52 highly efficient, it is difficult to apply as pest control in the field because of the very  
53 high costs of and complexity in preparing dsRNA. Fortunately, ingestion of specific  
54 dsRNA through the oral cavity can trigger a silencing response in most body tissues in  
55 insects; this paves the way for the development of RNAi-based agricultural pest  
56 control if dsRNA can be protected from degradation in the environment and insect  
57 intestines by suitable delivery methods.

58 Currently, wrapping dsRNA in nanomaterials or expressing dsRNA in bacteria are the  
59 two main methods of dsRNA-insect delivery. It has been reported that nanomaterials  
60 can improve the efficiency of delivery allowing dsRNA to permeate cell membranes  
61 directly or by endocytosis<sup>4</sup>; thus, this has become a new type of delivery agent and  
62 has been used in pest RNAi control<sup>5</sup>. Employing bacteria as delivery vectors of  
63 dsRNA molecules is another approach that has been used in recent years and was first  
64 carried out in the bacteriophagous nematode *C. elegans*<sup>6</sup>. Considering the technology  
65 and economic-related issues of dsRNA synthesis *in vitro*, there have been many  
66 reports of bacteria expressing dsRNA to induce insect RNAi to control pests<sup>7-9</sup>. Other

67 limitations related to the application of dsRNA for pest control include the  
68 identification of the appropriate target genes and increasing the insect lethality. For  
69 this point, genes targeted by chemical insecticides and bio-insecticides might be ideal  
70 sites for dsRNA targeting. It has been reported that silencing *SII02*, *MvIIS* and *OfCTP*  
71 through RNAi increases the toxicity of *Bacillus thuringiensis* (Bt)<sup>10-12</sup>.

72 With the cultivation of cruciferous crops, the diamondback moth (DBM), *P. xylostella*,  
73 has developed into a major pest worldwide<sup>13</sup>. Following the misuse of insecticides in  
74 the field, *P. xylostella* has developed such severe resistance to most pesticides through  
75 multiple mechanisms that it is difficult to control<sup>14,15</sup>. Although RNAi was reported to  
76 be less efficient in lepidoptera<sup>16</sup>, RNAi in *P. xylostella* through dsRNA injection or  
77 oral administration demonstrated that this approach is for this species<sup>17,18</sup>. Therefore,  
78 the control and resistance management of *P. xylostella* may be achieved by dsRNA  
79 ingestion and interference with specific target genes.

80 In insects,  $\gamma$ -aminobutyric acid receptors (GABARs) are the major inhibitory  
81 receptors widely distributed in the central nervous system<sup>19</sup> and are the target of  
82 natural compounds (picrotoxin) and synthetic pesticides (such as dieldrin, fipronil,  
83 fluxametamide and fluralaner)<sup>20-22</sup>. According to the classification of the Insecticide  
84 Resistance Action Committee (<https://irac-online.org/modes-of-action/>, IRAC),  
85 Compounds that act on GABAR are divided into two categories: blockers (Category 2,  
86 represented by fipronil and chlordane) and allosteric modulators (Category 30,  
87 represented by broflanilide and fluxametamide) (referred to as GABAR compounds in  
88 this paper). Resistance to dieldrin (*Rdl*) gene, which combines with other GABAR

89 subunits to constitute the target site of cyclodiene and phenylpyrazole pesticides, was  
90 cloned from dieldrin-resistant *Drosophila melanogaster* and named *Rdl*<sup>23</sup>. There are  
91 two *Rdls* in *P. xylostella*<sup>24</sup>. Our previous research showed that in *Xenopus oocytes*, the  
92 sensitivity of *PxRdl2* to fipronil was 40-fold lower than that in *P. xylostella Rdl1*. In  
93 addition, knockout of *PxRdl1* reduced the efficacy of fipronil, while knockout of  
94 *PxRdl2* increased its efficacy<sup>25</sup>. This may indicate that the *PxRdl2* gene plays an  
95 important role in resistance to GABAR compounds, which is beneficial for  
96 researching toxicology and resistance to insecticides. Based on previous results, we  
97 verified whether the knockout of *PxRdl2* or *PxRdl1* has effects on other GABAR  
98 compounds. Furthermore, we considered whether it is possible to develop  
99 *PxRdl2*-based RNAi to improve the efficacy of insecticides.

100 In this study, two homozygous knockout strains of *P. xylostella* (*Rdl1KO* and *Rdl2KO*)  
101 and susceptible strains were established to evaluate the differences in sensitivity of 5  
102 compounds by bioassay. The bioassay results suggested that the newly synthesized  
103 quinazolines-4a and the two new isoxazolines (fluxametamide and fluralaner)  
104 displayed greater activity in the *Rdl2KO* strain than in the susceptible strain.  
105 Furthermore, *PxRdl2* interference by dsRNA, which induced expression by  
106 transformed HT115 *Escherichia coli* (named dsRNA-Bac in this paper), could  
107 improve the efficacy of quinazoline and isoxazolines (named RNAi compound in this  
108 paper) in both susceptible and fipronil-resistant *P. xylostella*. In addition, we also  
109 verified the effect of UV radiation on dsRNA-Bac to ensure that it could remain stable  
110 when exposed to sunlight in field applications. In summary, our study provides new

111 insights for pest control, improving safety for nontarget organisms. Thus, the results  
112 may be beneficial for pesticide resistance management and reducing the usage of  
113 pesticides in the field, which could be part of an integrated pest management (IPM)  
114 approach.

## 115 **2 MATERIALS AND METHODS**

### 116 **2.1 Insect strain rearing and compounds**

117 Susceptible and fipronil-resistant *P. xylostella* were generously provided by Dr.  
118 Minsheng You (Fujian Agriculture and Forestry University, China). Two homozygous  
119 knockout strains (*Rdl1KO* and *Rdl2KO*) were previously established from susceptible  
120 strains using CRISPR/Cas9 previously<sup>25</sup>, and were reared on an artificial diet for more  
121 than 30 generations in our laboratory. The four strains were kept at 25±1 °C and  
122 65±5% relative humidity under 16:8 h (light: dark) conditions.

123 Compounds of fipronil (95%), fluxametamide (95%), chloranilprole (95%),  
124 fluralaner (95%) and abamectin (95%) were purchased from TargetMol (Shanghai,  
125 China). Compounds 5a<sup>26</sup> and 4a<sup>27</sup> were synthesized in our laboratory.

### 126 **2.2 Bioassays**

127 Two bioassays were conducted in this study. To evaluate the sensitivity of the  
128 susceptible, *Rdl1KO* and fipronil-resistant strains to the compounds, leaf-dip bioassays  
129 were carried out as recommended by the IRAC  
130 (<https://irac-online.org/methods/plutella-xylostella-larvae/>). The LCs of the different  
131 compounds were determined through the leaf-dip bioassays. To better simulate the  
132 outdoor spraying method applied in the field and to detect the impact of gene

133 silencing on the lethality of the compounds, RNAi compounds were subjected to  
134 leaf-dip bioassays, in which dsRNA-Bac was evenly applied to the surface of the  
135 leaves containing compounds.  
136 For the *PxRdl2* RNAi compounds, a sublethal dose (LC<sub>20</sub>) allowed the assessment of  
137 any increase in the mortality rate caused by RNAi-induced gene silencing. Third  
138 instar larvae were fed with leaves containing *PxRdl2* dsRNA-Bac (or *GFP*  
139 dsRNA-Bac) and compounds. Each treatment used at least 10 larvae with 4  
140 replications. Mortality was recorded every 12 h for 2 days. The theoretically reduced  
141 dosage was calculated by the following formula: (LCs – LC<sub>20</sub> of the *PxRdl2* RNAi  
142 compounds)/LCs × 100%. The impact of *PxRdl1* dsRNA on the chemical toxicity of *P.*  
143 *xylostella* was also assessed as described above, with the expectation that the LC<sub>50</sub> of  
144 each compound dosage was used.

### 145 **2.3 In vitro synthesis of *PxRdls* dsRNA**

146 Total RNA was extracted from 3rd instar larvae or bacteria using an RNAsimple Total  
147 RNA Kit (TianGen, Beijing, China). The extracted RNA (1 µg) was used to reverse  
148 transcribe cDNA using the PrimeScript™ RT reagent Kit with gDNA Eraser (Perfect  
149 Real Time) (TaKaRa Biotechnology, Dalian, China).  
150 A 428-bp fragment of *PxRdl1* and a 441-bp fragment of *PxRdl2* were amplified from  
151 cDNA extracted from larvae. The specific fragments were purified using an  
152 E.Z.N.A.® Gel Extraction Kit (OMEGA Bio-tek, Guangzhou, China). The PCR  
153 products were used as templates for the next PCR and primers containing the T7  
154 polymerase promoter sequence at their 5' ends were carried out. The PCR products

155 were used as templates to synthesize specific dsRNAs according to the  
156 manufacturer's instructions using the *in vitro* Transcription T7 Kit (TaKaRa  
157 Biotechnology, Dalian, China).

158 The 289-bp *GFP* fragment was amplified from the cloning vector  
159 pEGFP-N1-ro1*GFP* (Plasmid #82369, Addgene), and then, a similar method was  
160 applied to synthesize specific *GFP* dsRNA. All the primers in this paper were  
161 designed using Primer Premier 5 (Premier, Canada) and are shown in Table 1.

#### 162 **2.4 Construction of transformed HT115 *Escherichia coli* expressing dsRNA and** 163 **overexpression of dsRNA**

164 The 289-bp *GFP*, 428-bp *PxRdl1* and 441-bp *PxRdl2* fragments were cloned into  
165 L4440 vectors (Plasmid #1654, Addgene) via homologous recombination<sup>28,29</sup>. The  
166 recombinant L4440 vectors were transformed into HT115 *E. coli* competent cells. To  
167 produce dsRNA, the transformed bacteria were induced by isopropyl  
168  $\beta$ -D-1-thiogalactopyranoside (IPTG). dsRNA was extracted from the bacterial cells  
169 for subsequent qRT-PCR absolute quantification.

#### 170 **2.5 qRT-PCR absolute quantification of dsRNA produced by the transformed** 171 **bacteria**

172 qRT-PCR was carried out using SYBR<sup>®</sup> Premix Ex Taq<sup>™</sup> II (Takara Biotechnology)  
173 and a CFX96 Connect Real-Time system (Bio-Rad Laboratories, Inc., Hercules, CA,  
174 USA). Based on the absolute quantification method<sup>30</sup>, the quantity of the dsRNA was  
175 confirmed by threshold (CT) values, which relate to an established standard curve.

176 The standard curve for dsRNA was established by plotting the logarithm of a



177 10<sup>-10</sup>-fold dilution of the starting solution of template cDNA with inserts against the  
178 corresponding CT values.

## 179 **2.6 Pretreatment of bacteria**

180 Bacteria were collected by centrifugation at 5000×g for 5 min at 4°C and suspended  
181 in DEPC-H<sub>2</sub>O. To inactivate the bacteria and promote the release of dsRNA,  
182 sonication treatment was carried out by a low-temperature ultrahigh-pressure cell  
183 crusher (Guangzhou Juneng Nano & Biotechnology Co., Ltd, Guangzhou, China) at  
184 1800 bar. LB agar plates containing 100 µg mL<sup>-1</sup> ampicillin were used to evaluate  
185 whether the bacteria were totally inactivated.

## 186 **2.7 qRT-PCR relative quantification of *PxRdls* transcription**

187 dsRNA-Bac (100, 200 or 400 ng µL<sup>-1</sup>) was evenly applied to the surface of the leaves,  
188 and then naturally air-dried. Gene analysis was performed by qRT-PCR, which was  
189 carried out by using gene-specific primers, after 2 days of feeding the  
190 dsRNA-Bac-covered leaves to 3rd instar *P. xylostella* larvae. Gene-specific primers  
191 were designed to test a segment of the mRNA external to the segment targeted by the  
192 dsRNA. The qRT-PCR data were normalized to an internal control (*Actin* gene,  
193 GenBank No. JN410820.1) and analysed by the 2<sup>-ΔΔCT</sup> method<sup>31</sup>. Each treatment used  
194 5 larvae with 3 replications. The controls received *GFP* dsRNA-Bac.

## 195 **2.8 UV irradiation on dsRNA-Bac**

196 To better simulate the effects of field applications, a UV irradiation experiment was  
197 carried out to determine the stability of dsRNA-Bac. *PxRdl2* dsRNA-Bac and *GFP*  
198 dsRNA-Bac were placed on the surface of glassware. The glassware was placed on an

199 HD-650 desktop clean bench (Su Jing Purification Equipment, Zhejiang, China). A  
200 UV lamp was used to irradiate the glassware for 0 h, 0.5 h, 1 h, 2 h or 4 h (254 nm, 8  
201 W). Before UV irradiation, absolute quantification was carried out on the dsRNA-Bac.  
202 The treated dsRNA-Bac was fed to *P. xylostella* through leaves for gene expression  
203 analysis after two days.

## 204 **2.9 Statistical analysis**

205 For the leaf-dip bioassay data, SPSS 22.0 (SPSS Inc., Chicago, IL, USA) was used to  
206 calculate the LCs. The LCs were analysed using regression-probit analysis, and “Log  
207 base 10” was selected for transformation. The LC<sub>50</sub> values were confirmed to be  
208 significantly different if the 95% fiducial limits did not overlap. The other data were  
209 analysed using GraphPad Prism, version 5.0 (GraphPad Software Inc., La Jolla, CA,  
210 USA). Gene expression was analysed by one-way ANOVA and Tukey’s test (alpha =  
211 0.05). Survival curves of the *P. xylostella* 3rd instar larvae were compared using  
212 log-rank analyses.

## 213 **3 RESULTS**

### 214 **3.1 Toxicological responses of the two *Rdl* knockout strains to five compounds**

215 To test roles of the two *Rdl* homologous genes in the interaction with the five tested  
216 compounds, the responses of the two knockout strains and susceptible strain were  
217 measured (Table 2 and Fig. 1: data for fipronil were adapted from our previous  
218 publication<sup>25</sup>). The *Rdl1*KO strain showed greater resistance (2.85-fold) than the  
219 susceptible strain to the newly synthesized compound quinazoline (4a). In contrast,  
220 the toxicity of 4a to the *Rdl2*KO strain increased significantly as the resistance ratio

221 (RR) decreased to 0.45. These results revealed that while *PxRdl1* and *PxRdl2* are both  
222 vital determinants of the sensitivity of *P. xylostella* to 4a, they have adverse effects.  
223 Such a tendency was also observed in response to fipronil<sup>25</sup> and 5a treatment  
224 (unpublished data). The toxicity of fluxametamide to the *Rdl1*KO and *Rdl2*KO strains  
225 was significantly increased relative to that to the susceptible strain. Unlike  
226 fluxametamide, knockout of *PxRdl1* had no significant effect on fluralaner  
227 susceptibility, but knockout of *PxRdl2* increased fluralaner susceptibility (2.50-fold).  
228 No difference in toxicity was observed in the three strains for abamectin.  
229 The negative control, chloraniliprole, exhibited toxicity similar to that of the two *Rdl*  
230 knockout strains compared with that of the susceptible strain. The increased  
231 susceptibility to knockout of *Rdl2* suggested that it could be an ideal target for RNAi  
232 in the development of synergists with GABAR compounds.

### 233 **3.2 Production of bacteria expressing *PxRdls* dsRNA**

234 To construct a vector expressing dsRNA, the *GFP* and *PxRdls* PCR products were  
235 cloned into the L4440 vector, which was induced by the addition of IPTG to  
236 overexpress dsRNA under the double T7 promoters and used to transform HT115 *E.*  
237 *coli* cells. The quantity of dsRNA produced by the HT115 *E. coli* (Fig. 2a) was  
238 quantified by qRT-PCR (Fig. 2b, Fig. 2c, Fig. 2d). For *GFP*, the PCR efficiency (E =  
239 95.516%) was calculated according to the slope and the coefficient of correlation ( $R^2$ )  
240 of the standard curve (slope = -3.358, y intercept = 18.835,  $R^2$  = 0.996). For *PxRdl1*,  
241 the PCR efficiency (E = 108.930%) was calculated according to the slope and the  
242 coefficient of correlation ( $R^2$ ) of the standard curve (slope = -3.125, y intercept =

243 12.116,  $R^2 = 0.998$ ). For *PxRdl2*, the PCR efficiency ( $E = 92.780\%$ ) was calculated  
244 according to the slope and the coefficient of correlation ( $R^2$ ) of the standard curve  
245 (slope = -3.508, y intercept = 5.898,  $R^2 = 0.998$ ).

### 246 **3.3 Gene silencing in *P. xylostella* by feeding individuals leaves containing** 247 **dsRNA-Bac**

248 Quantitative analysis of the expression of the two *PxRdl* genes in 3rd instar larvae was  
249 performed by qRT-PCR two days after the larvae were fed leaves containing dsRNA  
250 produced by HT115 *E. coli*. The results demonstrated that the transcription levels of  
251 the targeted *PxRdl1* and *PxRdl2* genes were significantly affected by the dsRNA  
252 treatment and were positively correlated with the experimental dose used ( $P < 0.05$ )  
253 (Fig. 3a, Fig. 3b).

### 254 **3.4 The effect of UV irradiation on dsRNA-Bac**

255 After dsRNA-Bac was irradiated with UV for different times, the treated dsRNA-Bac  
256 was fed to 3rd instar larvae through leaves. The gene expression analysis data showed  
257 that dsRNA-Bac had strong stability and could maintain activity under strong UV  
258 irradiation for 1 h. The activity of dsRNA-Bac decreased when exposed to UV for  
259 more than 2 h ( $P < 0.05$ ) (Fig. 3c).

### 260 **3.5 *PxRdl2* dsRNA-Bac enhances the toxicity of quinazolines and isoxazolines in** 261 **susceptible *Plutella xylostella***

262 RNAi compounds were used to test the efficacy of the simultaneous administration of  
263 *PxRdl2* dsRNA-Bac and compounds (fipronil, quinazolines and isoxazolines). This  
264 experiment aimed to more closely reproduce the possible effects of the two active

265 ingredients (dsRNA and compounds) applied in the field. The results showed that  
266 simultaneous administration of *PxRdl2* dsRNA-Bac and compounds led to obviously  
267 higher mortality in *PxRdl2*-silenced larvae than in controls (Fig. 4) (log-rank test for  
268 3rd instar larvae exposed to different compounds: fipronil: chi-square = 4.501,  $df = 3$ ,  
269  $P = 0.0339$ ; fluxametamide: chi-square = 14.80,  $df = 3$ ,  $P = 0.0001$ ; fluralaner:  
270 chi-square = 12.33,  $df = 3$ ,  $P = 0.0004$ ; 5a: chi-square = 14.95,  $df = 3$ ,  $P = 0.0001$ ; 4a:  
271 chi-square = 34.26,  $df = 3$ ,  $P < 0.0001$ ).

272 In addition, to further evaluate the effect of RNAi compound-mediated toxicity  
273 enhancement, the theoretical reduction in compound usage was calculated. When the  
274 compounds were used alone, the LCs<sup>b</sup> in Table 3 shows the dose corresponding to  
275 mortality, indicating the final mortality of *PxRdl2* RNAi compounds after 48 h.  
276 According to the calculation results, the enhanced toxicity of the compounds mediated  
277 by RNAi could reduce the doses needed of different compounds (fipronil: 45.00%;  
278 fluxametamide: 56.82%; fluralaner: 45.45%; 5a: 59.31%; and 4a: 72.36%) (Table 3).

### 279 **3.6 *PxRdl1* dsRNA-Bac-mediated gene silencing led to reduced toxicity of** 280 **quinazolines and isoxazolines in susceptible *Plutella xylostella***

281 The LC<sub>50</sub> values of fipronil and the quinazolines and isoxazolines were used for a  
282 *PxRdl1* RNAi compound bioassay similar to that for *PxRdl2*. The data showed that  
283 *PxRdl1* silencing reduced the toxicity of fipronil and the quinazolines and  
284 fluxametamide, except for fluralaner (Fig. 5) (log-rank test of the 3rd instar larvae for  
285 different compounds, fipronil: chi-square = 11.11,  $df = 3$ ,  $P = 0.0009$ ; fluxametamide:  
286 chi-square = 4.672,  $df = 3$ ,  $P = 0.0307$ ; fluralaner: chi-square = 0.5698,  $df = 3$ ,  $P =$

287 0.4503; 5a: chi-square = 4.159,  $df = 3$ ,  $P = 0.0414$ ; 4a: chi-square = 8.844,  $df = 3$ ,  $P =$   
288 0.0029).

289 **3.7 *PxRdl2* dsRNA-Bac enhances the toxicity of quinazoline and isoxazolines in**  
290 **fipronil-resistant *Plutella xylostella***

291 Fipronil-resistant *P. xylostella* are extremely resistant to fipronil, and its resistance has  
292 increased 1881-fold. For 4a, the resistance also increased 14-fold. Compound 5a and  
293 two isoxazolines had good effects against fipronil-resistant *P. xylostella*. These 3  
294 compounds were used to the *PxRdl2* RNAi compounds. The data showed that these  
295 three compounds could increase the toxicity to fipronil-resistant *P. xylostella* of  
296 *PxRdl2* RNAi compounds (Fig. 6) (log-rank test of 3rd instar larvae for different  
297 compounds, fluxametamide: chi-square = 11.47,  $df = 3$ ,  $P = 0.0007$ ; fluralaner:  
298 chi-square = 4.964,  $df = 3$ ,  $P = 0.0259$ ; 5a: chi-square = 14.65,  $df = 3$ ,  $P = 0.0001$ ). In  
299 addition, the enhanced toxicity mediated by RNAi could reduce the dose required of  
300 different compounds, such as fluxametamide (58.06%), fluralaner (43.14%), and 5a  
301 (45.61%) (Table 4).

302 **4 DISCUSSION**

303 Recent studies have shown that the existence of multiple copies of homologous *Rdl*  
304 further enriches the functional library of GABARs in insects<sup>24,32,33</sup>. These different  
305 *Rdl* subunits may combine to produce GABARs with a series of physiological and  
306 pharmacological properties<sup>32,33</sup>. It has been reported that knockout of *Rdl1* or *Rdl2*  
307 alone does not affect the survival of *H. armigera* or *P. xylostella*<sup>25,34</sup>. These results  
308 indicated the functional redundancy of multiple homologous *Rdl* genes in *H. armigera*

309 and *P. xylostella*. We also tried to knockout both *Rdl* genes in *P. xylostella*, but  
310 unfortunately, no viable homozygous knockouts were obtained (the associated data  
311 and process were not shown in this paper). This may further illustrate the functional  
312 redundancy of the two *Rdls*, which cannot be deleted at the same time.

313 Three strains of the *Rdl* genotype in *P. xylostella* were used in bioassays of different  
314 compounds to clarify the role of the two *Rdls* as anti-compounds. Data from our  
315 previous bioassays showed that the *Rdl1*KO strain obtained 10.4-fold resistance to  
316 fipronil and that the *Rdl2*KO strains obtained 4.4-fold sensitivity to fipronil compared  
317 to the sensitivity of susceptible strains<sup>25</sup>. For 4a, knockout of *PxRdl1* significantly  
318 increased resistance, by 2.85-fold, whereas knockout of *PxRdl2* significantly  
319 increased susceptibility, by 2.21-fold. 5a is a possible antagonist of GABAR<sup>26</sup>, our  
320 unpublished results also proved that 5a has a similar trend to 4a and fipronil. This  
321 suggested that both *PxRdl1* and *PxRdl2* were involved in mediating fipronil and  
322 newly synthesized quinazolines toxicity. Furthermore, *PxRdl2* played an important  
323 role in anti-quinazolines activities, and *PxRdl2* was more tolerant than *PxRdl1* to  
324 quinazolines. In addition, different pharmacological properties between the two  
325 *PxRdls* may resolve their counter contribution to the sensitivities of *P. xylostella* to  
326 these compounds.

327 The novel isoxazoline insecticides fluxametamide and fluralaner were also used in the  
328 sensitivity tests of the three strains. The toxicity of the two isoxazolines to the three  
329 strains showed different trends, which may verify the novel mode of action compared  
330 to that of fipronil and two quinazolines. The key mode of action of avermectin in

331 invertebrates is to activate glutamate-gated chloride channels (GluCl<sub>s</sub>), although it has  
332 also been proposed that avermectin binds to and activates GABAR<sup>35</sup>. However, in our  
333 study, knockout of *PxRdl1* or *PxRdl2* did not affect sensitivity to abamectin,  
334 confirming that abamectin may not be active on *PxRdl1* or *PxRdl2* individually.  
335 Susceptibility to the negative control, chloraniliprole, was not significantly affected  
336 by knockout of either *PxRdl1* or *PxRdl2*. In summary, in pharmacological reactions,  
337 our results indicated that *PxRdl2* plays an important role in resisting quinazolines and  
338 isoxazolines.

339 Pest control based on RNAi, due to its specificity and minimal or nonexistent impact  
340 on nontarget species, provides new opportunities for the development of sustainable  
341 IPM plans. Baum et al<sup>36</sup> demonstrated that genetically engineered dsRNA expression  
342 in maize (*Zea mays*) could cause larval mortality in the western corn rootworm  
343 (WCR), *Diabrotica virgifera*. This aroused great interest from researchers related to  
344 the use of dsRNA produced by transgenic plants as a novel pest control agent. This  
345 new type of pest control tool has been widely applied in coleoptera because of its high  
346 RNAi efficiency<sup>37</sup>. Therefore, it should be further studied and expanded to control  
347 other important agricultural pests, such as lepidopteran. The reaction efficiency of  
348 lepidopteran insects to RNAi is uneven, and the dsRNA delivery mode will affect its  
349 interference efficiency. It has been reported that *H. armigera* and *S. littoralis* were  
350 sensitive to orally delivered dsRNA<sup>10,38</sup>. Moreover, there were also reports of RNAi in  
351 *P. xylostella* using orally delivered dsRNA<sup>39</sup>, which could provide us with references  
352 to control *P. xylostella* using RNAi.



353 In our previous research, *PxRdl2* was confirmed to play an important role in the fight  
354 against fipronil and the function of *PxRdl2* in fighting quinazolines and isoxazolines  
355 was verified in this article. This discovery allows the extension of a new pest control  
356 method aimed at enhancing the toxicity of insecticides through RNAi-mediated  
357 *PxRdl2* gene silencing in *P. xylostella*. However, the development of efficient, safe  
358 and economically sustainable RNAi delivery strategies is vital to achieve this goal. In  
359 this paper, we probed the utilization of bacteria as potential carriers of dsRNA  
360 targeting the *PxRdl2* gene and evaluated their effects on quinazolines and isoxazolines  
361 for the control of *P. xylostella*. The recombinant vector L4440 was transformed into  
362 HT115 *E. coli* to induce the expression of a specific dsRNA fragment, which may be  
363 the preferred method for the mass production of dsRNA. Expression of dsRNA by  
364 bacteria was effective in silencing the target gene *PxRdl2* and showed a quantitative  
365 dependence when administering *P. xylostella* dsRNA-Bac via leaves (Fig. 3a, Fig. 3b).  
366 It was previously reported that the dsRNA molecule was protected by the bacterial  
367 envelope and was not easily degraded (in both the environment and the insect gut),  
368 which could allow dsRNA to exist/release for a longer time<sup>38,40</sup>. This provides support  
369 for the application of RNAi technology in the field, where light (UV) is an important  
370 factor affecting the effect of dsRNA. In the laboratory, UV light is an important means  
371 for sterilization and digestion of nucleic acids. To better simulate field light factors,  
372 UV irradiation was carried out to test the stability of dsRNA-Bac. Compared with *in*  
373 *vitro* synthesized dsRNA<sup>41</sup>, our data showed that dsRNA-Bac was resistant to UV  
374 exposure and needed to be continuously irradiated with strong UV for more than 2 h

375 obviously to lose part of its activity (Fig. 3c). It was speculated that dsRNA-Bac may  
376 be more stable under the protection of the bacterial envelope than dsRNA directly  
377 exposed to the external environment. This experiment proved the stability of  
378 dsRNA-Bac under light exposure, because UV radiation in the laboratory is several  
379 times stronger than the intensity of solar UV radiation in the field, which laid the  
380 foundation for the use of dsRNA-Bac for RNAi in the field.

381 Feeding *P. xylostella* dsRNA-Bac confirmed that the target gene (*PxRdls*) was  
382 successfully silenced, which prompted us to evaluate the effect of *PxRdls* gene  
383 silencing on insecticidal activity. The data suggested that *PxRdl2* gene silencing  
384 induced by dsRNA-Bac has a strong synergistic effect with quinazolines and  
385 isoxazolines. Significantly, the mortality of larvae increased in the case of  
386 simultaneous feeding of compounds and dsRNA-Bac (Fig. 4). In addition, the  
387 theoretically reduced doses of the compounds were calculated and ranged from  
388 45.00% to 72.36%. To further verify these results, *PxRdl1* dsRNA-Bac was used for  
389 RNAi compound treatment. For fipronil and the quinazolines and fluxametamide, the  
390 results showed that the influence of *PxRdl1* was the opposite of the influence of  
391 *PxRdl2* (Fig. 5), which further verifies that *PxRdl2* is a key gene in the response to the  
392 compounds. However, fluralaner did not show the exact opposite results (Fig. 5c), and  
393 more research may be required to explore the mechanism driving this response. There  
394 was high resistance to fipronil and 4a in the fipronil-resistant *P. xylostella* (Table 2).  
395 Fortunately, 5a and two isoxazolines were very effective against the fipronil-resistant  
396 strain. In the subsequent *PxRdl2* RNAi compounds, silencing the *PxRdl2* gene also

397 increased the toxicity of the three compounds to the fipronil-resistant strain (Fig. 6).

398 The calculated theoretical reduction in the doses of the three compounds was from

399 43.14% to 58.06% (Table 4).

400 In summary, oral *PxRdl2* dsRNA-Bac combined with GABAR compounds could

401 increase the activity of the compounds against *P. xylostella*, and these combinations

402 are suitable for both susceptible and resistant strains. Stable dsRNA-Bac can be

403 prepared by bacteria in large quantities, which greatly reduces the associated costs,

404 supporting the development of pesticide sprays. Therefore, a spray may be developed

405 that includes dsRNA-Bac as a synergist of insecticides, which is beneficial for

406 reducing pesticide doses, delaying pest resistance and protecting nontarget organisms.

407

#### 408 **ACKNOWLEDGEMENTS**

409 We would like to thank Professor Xiaorong Wang for her support in insect rearing.

410 This work was supported by the National key R&D program of China

411 (2018YFD0200300), the Project of Science and Technology in Guangdong Province

412 (2018A030313188), the Natural Science Foundation of Guangdong Province

413 (2017A030310490) and the Research and Innovation Team of Key Technologies in

414 Modern Agricultural Industry in Guangdong Province (2019KJ130).

415

416

#### 417 **Competing financial interests**

418 The authors declare no competing financial interests.

419

420 **REFERENCES**

421 1 Fire A, Xu S, Montgomery MK, Kostas SA, Driver SE and Mello CC, Potent and  
422 specific genetic interference by double-stranded RNA in *Caenorhabditis elegans*.

423 *Nature* **391**: 806-811(1998).

424 2 Koch A and Kogel K, New wind in the sails: Improving the agronomic value of crop  
425 plants through RNAi-mediated gene silencing. *Plant Biotechnol J* **12**:

426 821-831(2014).

427 3 Zotti M, Dos Santos EA, Cagliari D, Christiaens O, Taning CNT and Smagghe G,  
428 RNA interference technology in crop protection against arthropod pests,

429 pathogens and nematodes. *Pest Manag Sci* **74**: 1239-1250(2018).

430 4 Al-Jamal KT, Nerl H, Müller KH, Ali-Boucetta H, Li S, Haynes PD, Jinschek JR,  
431 Prato M, Bianco A, Kostarelos K and Porter AE, Cellular uptake mechanisms of

432 functionalised multi-walled carbon nanotubes by 3D electron tomography  
433 imaging. *Nanoscale* DOI: **3**: 2627-2635(2011).

434 5 Sun Y, Wang P, Abouzaid M, Zhou H, Liu H, Yang P, Lin Y, Hull JJ and Ma W,  
435 Nanomaterial-wrapped dsCYP15C1, a potential RNAi-based strategy for pest

436 control against *Chilo suppressalis*. *Pest Manag Sci* **76**: 2483-2489(2020).

437 6 Timmons L, Court DL and Fire A, Ingestion of bacterially expressed dsRNAs can  
438 produce specific and potent genetic interference in *Caenorhabditis elegans*. *Gene*

439 **263**: 103-112(2001).

440 7 Chikami Y, Kawaguchi H, Suzuki T, Yoshioka H, Sato Y, Yaginuma T and Niimi T,

441 Oral RNAi of *diap1* results in rapid reduction of damage to potatoes in

- 442        *Henosepilachna vigintioctopunctata*. *J Pest Sci* **94**: 505–515(2021).
- 443    8 Dhandapani RK, Gurusamy D, Duan JJ and Palli SR, RNAi for management of  
444        Asian long-horned beetle, *Anoplophora glabripennis*: Identification of target  
445        genes. *J Pest Sci* **93**: 823-832(2020).
- 446    9 Bento FM, Marques RN, Campana FB, Demétrio CG, Leandro RA, Parra JRP and  
447        Figueira A, Gene silencing by RNAi via oral delivery of dsRNA by bacteria in  
448        the South American tomato pinworm, *Tuta absoluta*. *Pest Manag Sci* **76**:  
449        287-295(2020).
- 450    10 Caccia S, Astarita F, Barra E, Di Lelio I, Varricchio P and Pennacchio F,  
451        Enhancement of *Bacillus thuringiensis* toxicity by feeding *Spodoptera littoralis*  
452        larvae with bacteria expressing immune suppressive dsRNA. *J Pest Sci* **93**:  
453        303-314(2020).
- 454    11 Al BA, Jung JK and Kim Y, Alteration of insulin signaling to control insect pest by  
455        using transformed bacteria expressing dsRNA. *Pest Manag Sci* **76**:  
456        1020-1030(2019).
- 457    12 Guan R, Li H and Miao X, RNAi pest control and enhanced BT insecticidal  
458        efficiency achieved by dsRNA of chymotrypsin-like genes in *Ostrinia furnacalis*.  
459        *J Pest Sci* **90**: 745-757(2017).
- 460    13 Grzywacz D, Rossbach A, Rauf A, Russell DA, Srinivasan R and Shelton AM,  
461        Current control methods for diamondback moth and other brassica insect pests  
462        and the prospects for improved management with lepidopteran-resistant Bt  
463        vegetable brassicas in Asia and Africa. *Crop Prot* **29**: 68-79(2010).

- 464 14 Troczka B, Zimmer CT, Elias J, Schorn C, Bass C, Davies TGE, Field LM,  
465 Williamson MS, Slater R and Nauen R, Resistance to diamide insecticides in  
466 diamondback moth, *Plutella xylostella* (Lepidoptera: Plutellidae) is associated  
467 with a mutation in the membrane-spanning domain of the ryanodine receptor.  
468 *Insect Biochem Molec* **42**: 873-880(2012).
- 469 15 Endersby NM, Viduka K, Baxter SW, Saw J, Heckel DG and McKechnie SW,  
470 Widespread pyrethroid resistance in Australian diamondback moth, *Plutella*  
471 *xylostella* (L.), is related to multiple mutations in the para sodium channel gene.  
472 *B Entomol Res* **101**: 393-405(2011).
- 473 16 Shukla JN, Kalsi M, Sethi A, Narva KE, Fishilevich E, Singh S, Mogilicherla K  
474 and Palli SR, Reduced stability and intracellular transport of dsRNA contribute  
475 to poor RNAi response in lepidopteran insects. *Rna Biol* **13**: 656-669(2016).
- 476 17 Zhang Z, Kong J, De Mandal S, Li S, Zhihua, Zheng, Jin F and Xu X, An  
477 immune-responsive PGRP-S1 regulates the expression of antibacterial peptide  
478 genes in diamondback moth, *Plutella xylostella* (L.). *Int J Biol Macromol* **142**:  
479 114-124(2019).
- 480 18 Pana Z, Xub L, Liua B, Zhang J, Chen Z, Chen Q and Zhua Y, PxAPN5 serves as a  
481 functional receptor of Cry2Ab in *Plutella xylostella* (L.) and its binding domain  
482 analysis. *Int J Biol Macromol* **105**: 516-521(2017).
- 483 19 Sattelle DB, GABA receptors of insects, in: *Advances in Insect Physiology*, ed. by  
484 Evans PD and Wigglesworth VB, Academic Press, pp. 1-113 (1990).
- 485 20 Buckingham SD and Sattelle DB, GABA receptors of insects, in: *Comprehensive*

- 486 Molecular Insect Science, ed. by Gilbert LK and Gill SS, pp. 107-142 (2005).
- 487 21 Gassel M, Wolf C, Noack S, Williams H and Ilg T, The novel isoxazoline  
488 ectoparasiticide fluralaner: Selective inhibition of arthropod  $\gamma$ -aminobutyric acid-  
489 and l-glutamate-gated chloride channels and insecticidal/acaricidal activity.  
490 *Insect Biochem Molec* **45**: 111-124(2014).
- 491 22 Asahi M, Kobayashi M, Kagami T, Nakahira K, Furukawa Y and Ozoe Y,  
492 Fluxametamide: A novel isoxazoline insecticide that acts via distinctive  
493 antagonism of insect ligand-gated chloride channels. *Pestic Biochem Phys* **151**:  
494 67-72(2018).
- 495 23 French-Constant RH, Mortlock DP, Shaffer CD, MacIntyre RJ and Roush RT,  
496 Molecular cloning and transformation of cyclodiene resistance in *Drosophila*: An  
497 invertebrate gamma-aminobutyric acid subtype a receptor locus. *Proc Natl Acad*  
498 *Sci U S A* **88**: 7209-7213(1991).
- 499 24 Yuan G, Gao W, Yang Y and Wu Y, Molecular cloning, genomic structure, and  
500 genetic mapping of two Rdl-orthologous genes of GABA receptors in the  
501 diamondback moth, *Plutella xylostella*. *Arch Insect Biochem* **74**: 81-90(2010).
- 502 25 Li BJ, Wang KK, Chen DP, Yan Y, Cai XL, Chen HM, Dong K, Lin F and Xu HH,  
503 Distinct roles of two RDL GABA receptors in fipronil action in the diamondback  
504 moth (*Plutella xylostella*). *Insect Sci* **0**: 1-13 (2021).
- 505 26 Jiang X, Yang S, Yan Y, Lin F, Zhang L, Zhao W, Zhao C and Xu H, Design,  
506 Synthesis, and Insecticidal Activity of 5,5-Disubstituted  
507 4,5-Dihydropyrazolo[1,5-a]quinazolines as Novel Antagonists of GABA

- 508 Receptors. *J Agr Food Chem* **68**: 15005-15014(2020).
- 509 27 Yang S, Lai Q, Lai F, Jiang X, Zhao C and Xu H, Design, synthesis, and  
510 insecticidal activities of novel 5-substituted  
511 4,5-dihydropyrazolo[1,5-a]quinazoline derivatives. *Pest Manag Sci* **77**:  
512 1013-1022(2021).
- 513 28 Kostylev M, Otwell AE, Richardson RE and Suzuki Y, Cloning should be simple:  
514 *Escherichia coli* DH5 $\alpha$ -Mediated assembly of multiple DNA fragments with  
515 short end homologies. *Plos One* **10**: e0137466(2015).
- 516 29 Motohashi K, Evaluation of the efficiency and utility of recombinant enzyme-free  
517 seamless DNA cloning methods. *Biochemistry and Biophysics Reports* **9**:  
518 310-315(2017).
- 519 30 Rutledge RG, Mathematics of quantitative kinetic PCR and the application of  
520 standard curves. *Nucleic Acids Res* **31**: e93(2003).
- 521 31 Livak KJ and Schmittgen TD, Analysis of relative gene expression data using  
522 Real-Time quantitative PCR and the 2 $-\Delta\Delta$ CT method. **25**: 402-408(2001).
- 523 32 Del Villar Sand Jones A, Cloning and functional characterisation of the duplicated  
524 RDL subunits from the pea Aphid, *Acyrtosiphon pisum*. *Int J Mol* **19**:  
525 2235(2018).
- 526 33 Ménard C, Folacci M, Brunello L, Charreton M, Collet C, Mary R, Rousset M,  
527 Thibaud J, Vignes M, Charnet P and Cens T, Multiple combinations of RDL  
528 subunits diversify the repertoire of GABA receptors in the honey bee parasite  
529 *Varroa destructor*. *J Biol Chem* **293**: 19012-19024(2018).



- 530 34 Wang J, Zhao X, Yan R, Wu S, Wu Y and Yang Y, Reverse genetics reveals  
531 contrary effects of two Rdl-homologous GABA receptors of *Helicoverpa*  
532 *armigera* on the toxicity of cyclodiene insecticides. *Pestic Biochem Phys* **170**:  
533 104699(2020).
- 534 35 Wolstenholme AJ, Glutamate-gated chloride channels. *J Biol Chem* **287**:  
535 40232-40238(2012).
- 536 36 Baum JA, Bogaert T, Clinton W, Heck GR, Feldmann P, Ilagan O, Johnson S,  
537 Plaetinck G, Munyikwa T, Pleau M, Vaughn T and Roberts J, Control of  
538 coleopteran insect pests through RNA interference. *Nat Biotechnol* **25**:  
539 1322-1326(2007).
- 540 37 Zhu KY and Palli SR, Mechanisms, applications, and challenges of insect RNA  
541 interference. *Annu Rev Entomol* **65**: 293-311(2020).
- 542 38 Lim ZX, Robinson KE, Jain RG, Sharath Chandra G, Asokan R, Asgari S and  
543 Mitter N, Diet-delivered RNAi in *Helicoverpa armigera* – Progresses and  
544 challenges. *J Insect Physiol* **85**: 86-93(2016).
- 545 39 Guo Z, Kang S, Zhu X, Xia J, Wu Q, Wang S, Xie W and Zhang Y, The novel ABC  
546 transporter ABCH1 is a potential target for RNAi-based insect pest control and  
547 resistance management. *Sci Rep-Uk* **5**: 13728(2015).
- 548 40 Vatanparast Mand Kim Y, Optimization of recombinant bacteria expressing dsRNA  
549 to enhance insecticidal activity against a lepidopteran insect, *Spodoptera exigua*.  
550 *Plos One* **12**: e183054(2017).
- 551 41 San Miguel K and Scott JG, The next generation of insecticides: dsRNA is stable

552 as a foliar-applied insecticide. *Pest Manag Sci* **72**: 801-809(2016).

553

554

### Figure Legends

555 **Fig. 1** Resistance levels of the *Rdl1*KO (*PxRdl1* knockout strain) and the *Rdl2*KO  
556 (*PxRdl2* knockout strain) to chemical insecticides compared with the susceptible  
557 strain of *Plutella xylostella*. Resistance ratio = LC<sub>50</sub> of *Rdl1*KO or *Rdl2*KO divided by  
558 LC<sub>50</sub> of susceptible. \* mean their LC<sub>50</sub>s are significantly different from susceptible.

559 **Fig. 2** Production of HT115 *Escherichia coli* cells expressing dsRNA. **a** Expression of  
560 dsRNA by transformed HT115 *E. coli*; the total RNA were carried out to RT-PCR, and  
561 the production of amplification were resolved on 1% agarose gel. The specific  
562 primers used for *GFP*, *PxRdl1* or *PxRdl2* genes produced amplicons of the expected  
563 fragments in transformed HT115 *E. coli* (lines 1, 2 and 3), whereas the same primers  
564 did not produced any fragment from non-transformed HT115 *E. coli* (WT) (lines 4, 5  
565 and 6). **b c** and **d** Standard curves used on qRT-PCR absolute quantification of *GFP*,  
566 *PxRdl1* and *PxRdl2* dsRNA produced by *E. coli* suspensions.

567 **Fig. 3** mRNA expression of *PxRdls* gene in *Plutella xylostella* 3rd instar larvae orally  
568 treated for 2 days with dsRNA-Bac. **a** and **b** The *PxRdl1* and *PxRdl2* gene are  
569 down-regulated upon ingestion of dsRNA-Bac administered by leaves, which was  
570 dose-dependent; **c** The *PxRdl2* dsRNA-Bac treated different UV irradiation times (0h,  
571 1h, 2h, 4h) was fed to *P. xylostella* 3rd instar larvae for 2 days. UV irradiation for less  
572 than 1h had no obvious effect on the activity of dsRNA-Bac. *GFP* dsRNA-Bac were  
573 used as control. The values are the mean  $\pm$  standard errors (\*  $P < 0.05$ , Tukey' s test).

574 **Fig. 4** *PxRdl2* RNAi-compounds in susceptible *Plutella xylostella* 3rd instar larvae  
575 Susceptible 3rd instar larvae were treated for 2 days with leaves containing with  
576 *PxRdl2* dsRNA-Bac (corresponding to 400 ng  $\mu\text{L}^{-1}$  of dsRNA) and with compounds  
577 (LC<sub>20</sub>). **a** for fipronil, \*  $P = 0.0339$ ; **b** for fluxametamide, \*\*\*  $P = 0.0001$ ; **c** for  
578 fluralaner \*\*\*  $P = 0.0004$ ; **d** for 5a \*\*\*  $P = 0.0001$ ; **e** for 4a \*\*\*  $P < 0.0001$  (based on  
579 log-rank test).

580 **Fig. 5** *PxRdl1* RNAi-compounds in susceptible *Plutella xylostella* 3rd instar larvae  
581 Susceptible 3rd instar larvae were treated for 2 days with leaves containing with  
582 *PxRdl1* dsRNA-Bac (corresponding to 400 ng  $\mu\text{L}^{-1}$  of dsRNA) and with compounds  
583 (LC<sub>50</sub>). **a** for fipronil, \*\*\*  $P = 0.0009$ ; **b** for fluxametamide, \*  $P = 0.0307$ ; **c** for  
584 fluralaner  $P = 0.4503$ ; **d** for 5a \*  $P = 0.0414$ ; **e** for 4a \*\*  $P = 0.0029$  (based on  
585 log-rank test).

586 **Fig. 6** *PxRdl2* RNAi-compounds in fipronil-resistant *Plutella xylostella* 3rd instar  
587 larvae  
588 Fipronil-resistant 3rd instar larvae were treated for 2 days with leaves containing with  
589 *PxRdl2* dsRNA-Bac (corresponding to 400 ng  $\mu\text{L}^{-1}$  of dsRNA) and with compounds  
590 (LC<sub>20</sub>). **a** for fluxametamide, \*\*\*  $P = 0.0007$ ; **b** for fluralaner, \*  $P = 0.0259$ ; **c** for 5a,  
591 \*\*\*  $P = 0.0001$  (based on log-rank test).

592 Table 1 Detailed information of primers used in this study.

| Primer name                  | Nucleotide sequence (5'-3')                           | Function                                                                    |                                                           |
|------------------------------|-------------------------------------------------------|-----------------------------------------------------------------------------|-----------------------------------------------------------|
| <i>GFP-F</i>                 | CAGTGCTTCAGCCGCTACCC                                  | Amplification of <i>GFP</i>                                                 |                                                           |
| <i>GFP-R</i>                 | AGTTCACCTTGATGCCGTTCTT                                |                                                                             |                                                           |
| <i>Rdl1-F</i>                | AGCAATACTGGATTCATT                                    | Amplification of <i>PxRdl1</i>                                              |                                                           |
| <i>Rdl1-R</i>                | TCTCTATATGGCACAGTTGT                                  |                                                                             |                                                           |
| <i>Rdl2-F</i>                | TGGTCTTCGCTAGTCTTT                                    | Amplification of <i>PxRdl2</i>                                              |                                                           |
| <i>Rdl2-R</i>                | AATTTGTTGATTCCCTTC                                    |                                                                             |                                                           |
| <i>T7-GFP-F<sup>a</sup></i>  | <b>TAATACGACTCACTATAGGGC</b><br>AGTGCTTCAGCCGCTACCC   | <i>In vitro</i> synthesis of <i>GFP</i><br>dsRNA                            |                                                           |
| <i>T7-GFP-R<sup>a</sup></i>  | <b>TAATACGACTCACTATAGGG</b><br>AGTTCACCTTGATGCCGTTCTT |                                                                             |                                                           |
| <i>T7-Rdl1-F<sup>a</sup></i> | <b>TAATACGACTCACTATAGGG</b><br>AGCAATACTGGATTC        | <i>In vitro</i> synthesis of <i>PxRdl1</i><br>dsRNA                         |                                                           |
| <i>T7-Rdl1-R<sup>a</sup></i> | <b>TAATACGACTCACTATAGGGT</b><br>CTCTATATGGCACA        |                                                                             |                                                           |
| <i>T7-Rdl2-F<sup>a</sup></i> | <b>TAATACGACTCACTATAGGGT</b><br>GGTCTTCGCTAGTCT       | <i>In vitro</i> synthesis of <i>PxRdl2</i><br>dsRNA                         |                                                           |
| <i>T7-Rdl2-R<sup>a</sup></i> | <b>TAATACGACTCACTATAGGGA</b><br>TTTGTGATTCCCTTCG      |                                                                             |                                                           |
| qPCR-AQ- <i>GFP-F</i>        | GCCGCTACCCCGACCACAT                                   | Absolute quantification of<br>dsRNA produced by the<br>transformed bacteria |                                                           |
| qPCR-AQ- <i>GFP-R</i>        | CGCCCTCGAACTTCACCTC                                   |                                                                             |                                                           |
| qPCR-AQ- <i>Rdl1-F</i>       | GCGTAGAGACATTATCAGTT                                  |                                                                             |                                                           |
| qPCR-AQ- <i>Rdl1-R</i>       | AATTCGTTGCTCGTAGTAG                                   |                                                                             |                                                           |
| qPCR-AQ- <i>Rdl2-F</i>       | GGCTGCTGAGAAGAAA                                      |                                                                             |                                                           |
| qPCR-AQ- <i>Rdl2-R</i>       | GGGAGTGTGGGACCTA                                      |                                                                             |                                                           |
| qPCR- <i>Actin-F</i>         | TGGCACACACCTTCTAC                                     |                                                                             | Relative quantification of<br><i>PxRdls</i> transcription |
| qPCR- <i>Actin-R</i>         | CATGATCTGGGTCATCTTCT                                  |                                                                             |                                                           |
| qPCR- <i>Rdl1-F</i>          | GAAGTTGCCTCCAGACTGC                                   |                                                                             |                                                           |
| qPCR- <i>Rdl1-R</i>          | CCACCCTTTGAATGTGCC                                    |                                                                             |                                                           |
| qPCR- <i>Rdl2-F</i>          | GTCAGTCAGCTACGACAAACG                                 |                                                                             |                                                           |
| qPCR- <i>Rdl2-R</i>          | AAATCCAGGGTAAAATCCAT                                  |                                                                             |                                                           |

<sup>a</sup>The bold nucleotide sequences are the T7 promoter.

593 Table 2 Toxicity of different compounds to susceptible, fipronil-resistant and *Rdl*KO  
 594 *Plutella xylostella*.  
 595

| Compound <sup>a</sup>  | Strain <sup>b</sup> | N <sup>c</sup> | Slope ± SE  | LC <sub>50</sub> (mg L <sup>-1</sup> ) (95% FL <sup>d</sup> ) | RR <sup>e</sup> |
|------------------------|---------------------|----------------|-------------|---------------------------------------------------------------|-----------------|
| fipronil <sup>25</sup> | susceptible         | 238            | 2.66 ± 0.02 | 0.22 (0.19-0.26)                                              | -               |
|                        | <i>Rdl</i> 1KO      | 242            | 2.27 ± 0.22 | 2.29 (1.90-2.76)                                              | 10.41           |
|                        | <i>Rdl</i> 2KO      | 239            | 2.58 ± 0.01 | 0.05 (0.04-0.06)                                              | 0.23            |
|                        | resistant           | 243            | 4.43 ± 0.48 | 413.83 (366.49-459.29)                                        | 1881.05         |
| fluxametamide          | susceptible         | 246            | 2.65 ± 0.43 | 0.079 (0.051-0.59)                                            | -               |
|                        | <i>Rdl</i> 1KO      | 252            | 4.06 ± 0.44 | 0.042 (0.037-0.047)                                           | 0.53            |
|                        | <i>Rdl</i> 2KO      | 253            | 3.21 ± 0.37 | 0.043 (0.038-0.050)                                           | 0.54            |
|                        | resistant           | 247            | 2.19 ± 0.21 | 0.31 (0.18-0.51)                                              | 3.92            |
| fluralaner             | susceptible         | 243            | 4.40 ± 0.85 | 0.010 (0.0090-0.012)                                          | -               |
|                        | <i>Rdl</i> 1KO      | 242            | 5.53 ± 0.73 | 0.0090 (0.0060-0.015)                                         | 0.90            |
|                        | <i>Rdl</i> 2KO      | 252            | 4.67 ± 0.48 | 0.0040 (0.0040-0.0050)                                        | 0.40            |
|                        | resistant           | 246            | 2.44 ± 0.31 | 0.065 (0.033-0.333)                                           | 6.50            |
| 5a                     | susceptible         | 244            | 3.16 ± 0.35 | 1.74 (0.86-3.18)                                              | -               |
|                        | resistant           | 244            | 3.19 ± 0.41 | 5.24 (4.58-5.94)                                              | 3.01            |
| 4a                     | susceptible         | 241            | 3.01 ± 0.34 | 3.93 (3.41-4.60)                                              | -               |
|                        | <i>Rdl</i> 1KO      | 242            | 5.32 ± 0.58 | 11.19 (10.32-12.17)                                           | 2.85            |
|                        | <i>Rdl</i> 2KO      | 251            | 2.50 ± 0.29 | 1.78 (1.51-2.11)                                              | 0.45            |
|                        | resistant           | 250            | 4.41 ± 0.50 | 57.95 (40.35-79.44)                                           | 14.75           |
| abamectin              | susceptible         | 252            | 1.69 ± 0.24 | 0.012 (0.0080-0.015)                                          | -               |
|                        | <i>Rdl</i> 1KO      | 236            | 2.30 ± 0.27 | 0.015 (0.012-0.018)                                           | 1.25            |
|                        | <i>Rdl</i> 2KO      | 254            | 2.33 ± 0.25 | 0.016 (0.014-0.020)                                           | 1.33            |
| chloraniliprole        | susceptible         | 236            | 1.30 ± 0.19 | 1.32 (0.88-1.81)                                              | -               |
|                        | <i>Rdl</i> 1KO      | 233            | 1.41 ± 0.19 | 1.70 (1.23-2.27)                                              | 1.29            |
|                        | <i>Rdl</i> 2KO      | 238            | 1.11 ± 0.18 | 1.58 (1.03-2.25)                                              | 1.20            |

<sup>a</sup>4a is a compound synthesized by Shuai Yang et al., 2020; 5a is a compound synthesized by Xunyu Jiang et al., 2020 (same below) (Only susceptible and resistant data is showed).

<sup>b</sup>Susceptible: susceptible strain; *Rdl*1KO: *PxRdl1* knockout strain; *Rdl*2KO: *PxRdl2* knockout strain; resistant: fipronil-resistant strain.

<sup>c</sup>Number of larvae tested.

<sup>d</sup>95% Fiducial limits.

<sup>e</sup>Resistance ratio was calculated by LC<sub>50</sub> of *Rdl*1KO, *Rdl*2KO or resistant divided by LC<sub>50</sub> of susceptible.

596 Table 3 The LCs of 5 compounds in susceptible *Plutella xylostella*

597

| compound      | LC <sub>20</sub> <sup>a</sup> | LC <sub>45</sub> <sup>b</sup><br>(45%) <sup>c</sup> | LC <sub>55</sub> <sup>b</sup><br>(55%) <sup>c</sup> | LC <sub>60</sub> <sup>b</sup><br>(60%) <sup>c</sup> | LC <sub>65</sub> <sup>b</sup><br>(65%) <sup>c</sup> | LC <sub>80</sub> <sup>b</sup><br>(80%) <sup>c</sup> | Reduce dosage(%) <sup>d</sup> | LC <sub>50</sub> <sup>e</sup> |
|---------------|-------------------------------|-----------------------------------------------------|-----------------------------------------------------|-----------------------------------------------------|-----------------------------------------------------|-----------------------------------------------------|-------------------------------|-------------------------------|
| fipronil      | 0.11                          | 0.20                                                |                                                     |                                                     |                                                     |                                                     | 45.00%                        | 0.22                          |
| fluxametamide | 0.038                         |                                                     | 0.088                                               |                                                     |                                                     |                                                     | 56.82%                        | 0.079                         |
| fluralaner    | 0.0060                        |                                                     |                                                     | 0.011                                               |                                                     |                                                     | 45.45%                        | 0.010                         |
| 5a            | 0.94                          |                                                     |                                                     |                                                     | 2.31                                                |                                                     | 59.31%                        | 1.74                          |
| 4a            | 2.07                          |                                                     |                                                     |                                                     |                                                     | 7.49                                                | 72.36%                        | 3.93                          |

<sup>a</sup>LC<sub>20</sub> for *PxRdl2* RNAi-compounds.

<sup>b</sup>LCs: The dose corresponding to the mortality of the compounds used alone.

<sup>c</sup>The final mortality of *PxRdl2* RNAi-compounds after 48 h.

<sup>d</sup>Theoretically reduce dosage = (LCs – LC<sub>20</sub> of the *PxRdl2* RNAi compounds)/LCs × 100%.

<sup>e</sup>LC<sub>50</sub> for *PxRdl1* RNAi-compounds.

598

599

600

601 Table 4 The LCs of 5 compounds in fipronil-resistant *Plutella xylostella*

| compound <sup>a</sup> | LC <sub>20</sub> <sup>b</sup> | LC <sub>40</sub> <sup>c</sup><br>(40%) <sup>d</sup> | LC <sub>50</sub> <sup>c</sup><br>(50%) <sup>d</sup> | Reduce dosage(%) <sup>e</sup> |
|-----------------------|-------------------------------|-----------------------------------------------------|-----------------------------------------------------|-------------------------------|
| fipronil              | 267.24                        | -                                                   |                                                     |                               |
| fluxametamide         | 0.13                          |                                                     | 0.31                                                | 58.06%                        |
| fluralaner            | 0.029                         | 0.051                                               |                                                     | 43.14%                        |
| 5a                    | 2.85                          |                                                     | 5.24                                                | 45.61%                        |
| 4a                    | 37.34                         | -                                                   |                                                     |                               |

<sup>a</sup>High resistance to fipronil and 4a, no RNAi-compounds.

<sup>b</sup>LC<sub>20</sub> for *PxRdl2* RNAi-compounds.

<sup>c</sup>LCs: The dose corresponding to the mortality of the compound used alone.

<sup>d</sup>The final mortality of *PxRdl2* RNAi-compounds after 48 h.

<sup>e</sup>Theoretically reduce dosage = (LCs – LC<sub>20</sub> of the *PxRdl2* RNAi compounds)/LCs × 100%.



**Figure 1**

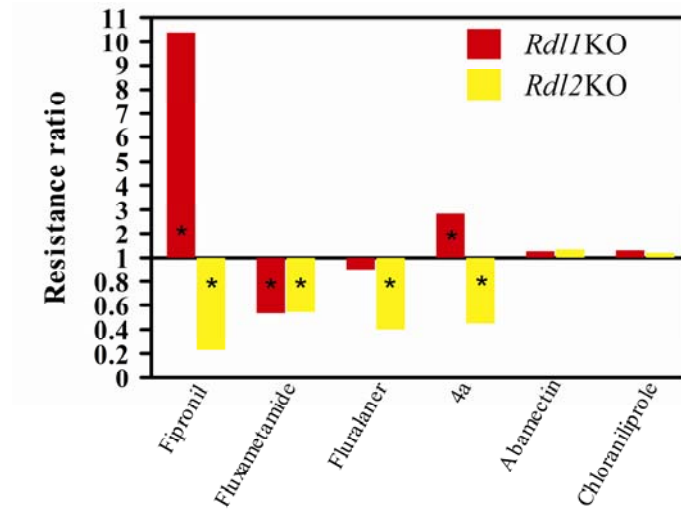

**Figure 2**

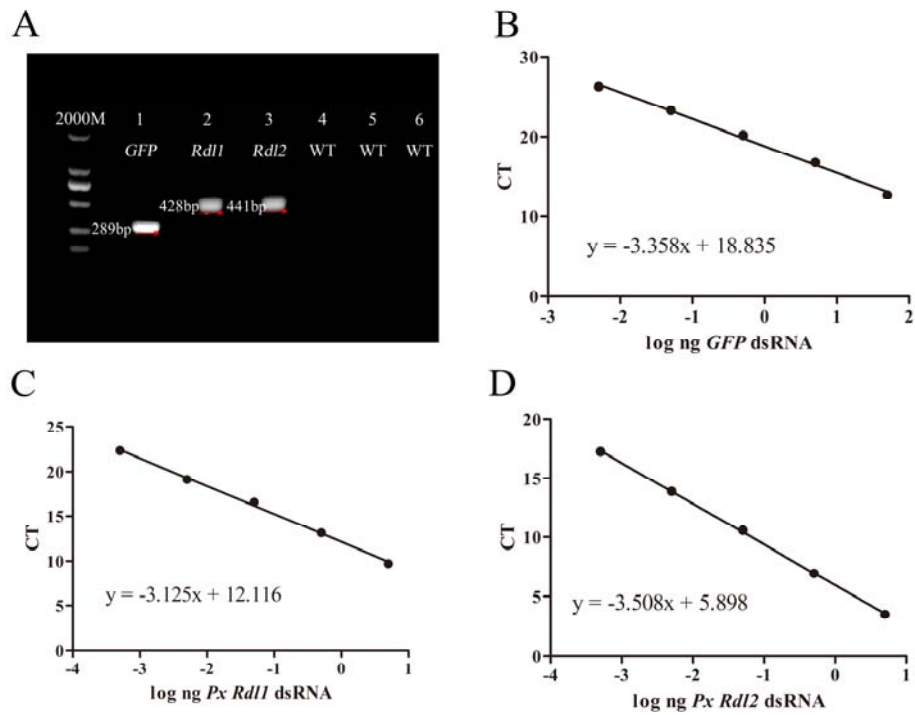



**Figure 3**

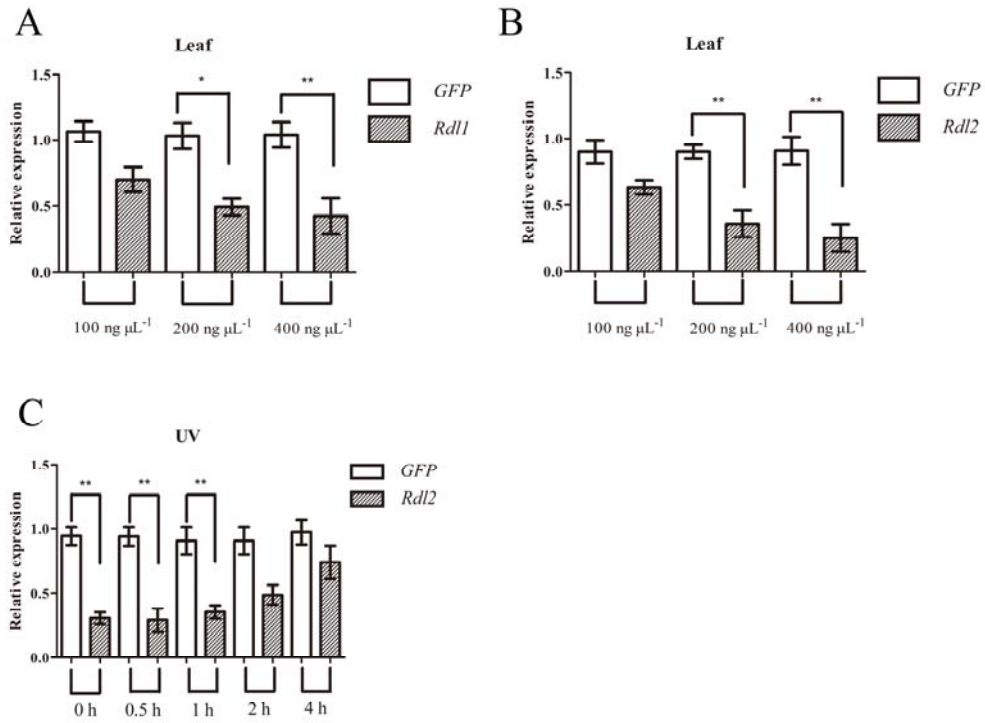

**Figure 4**

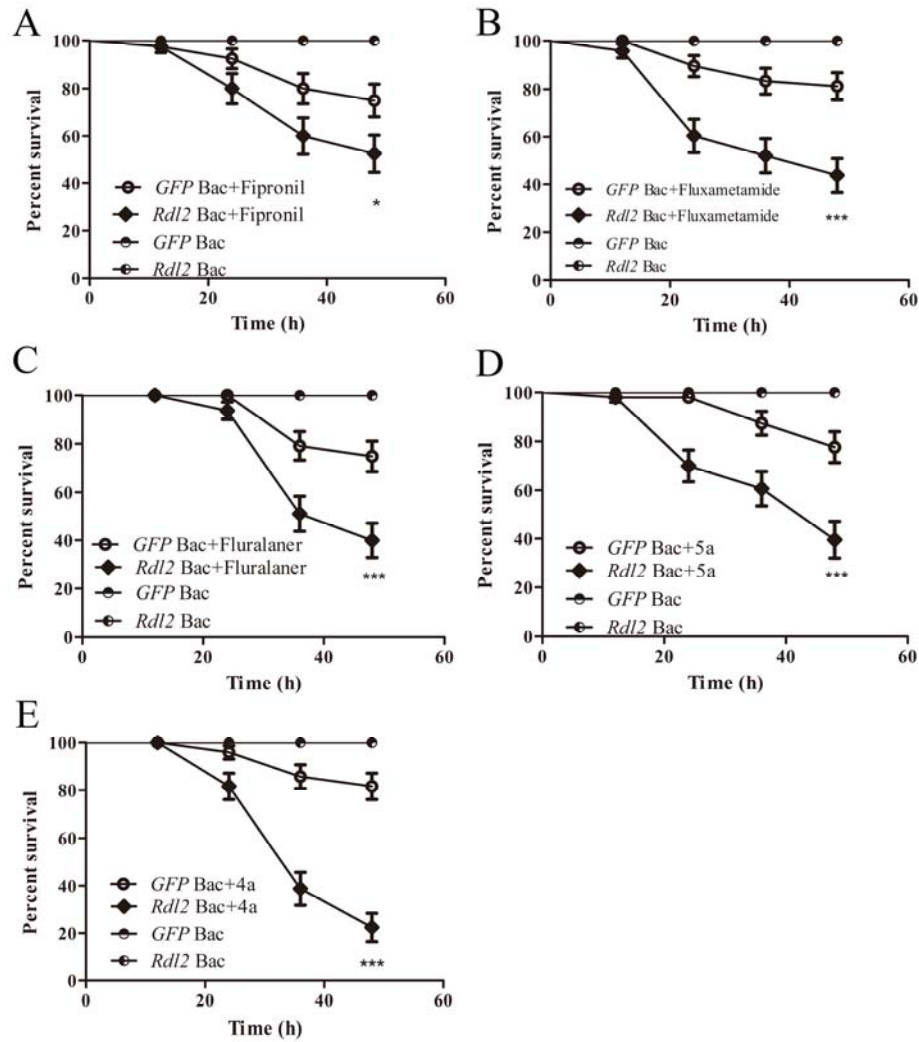

Figure 5

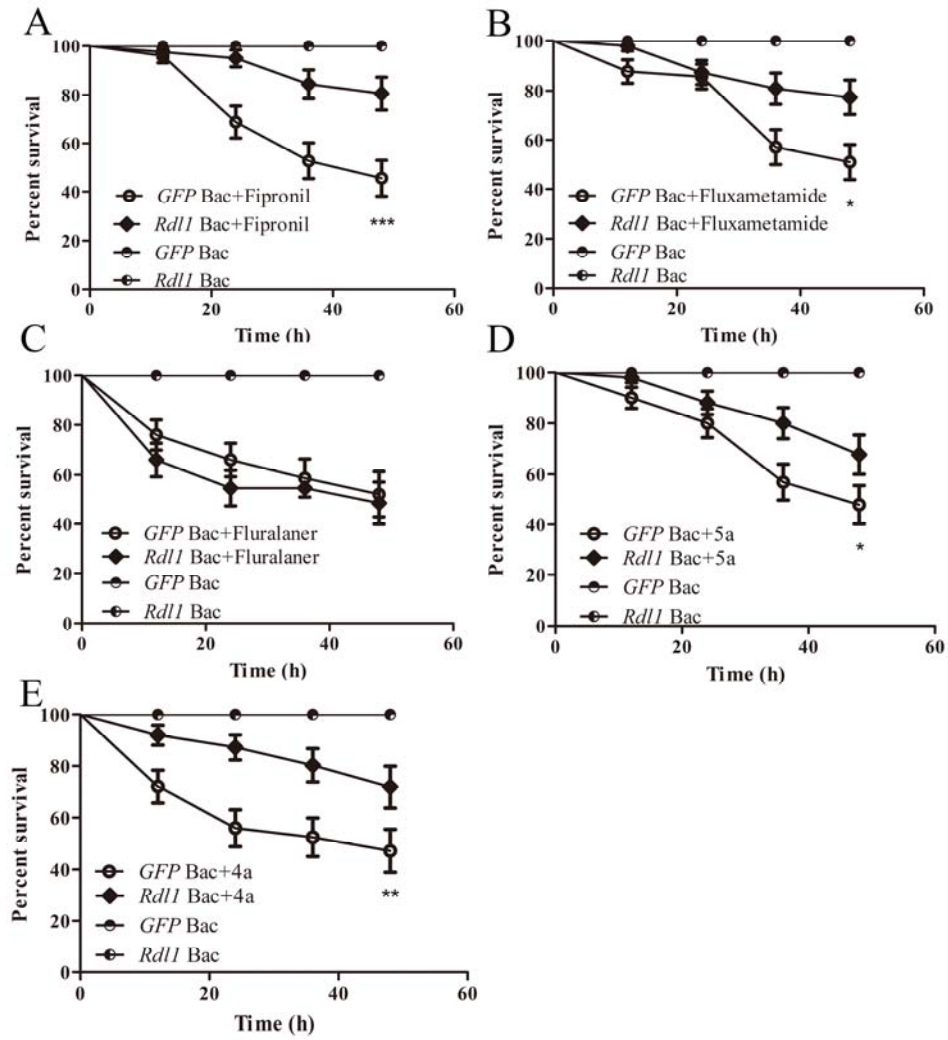

Figure 6

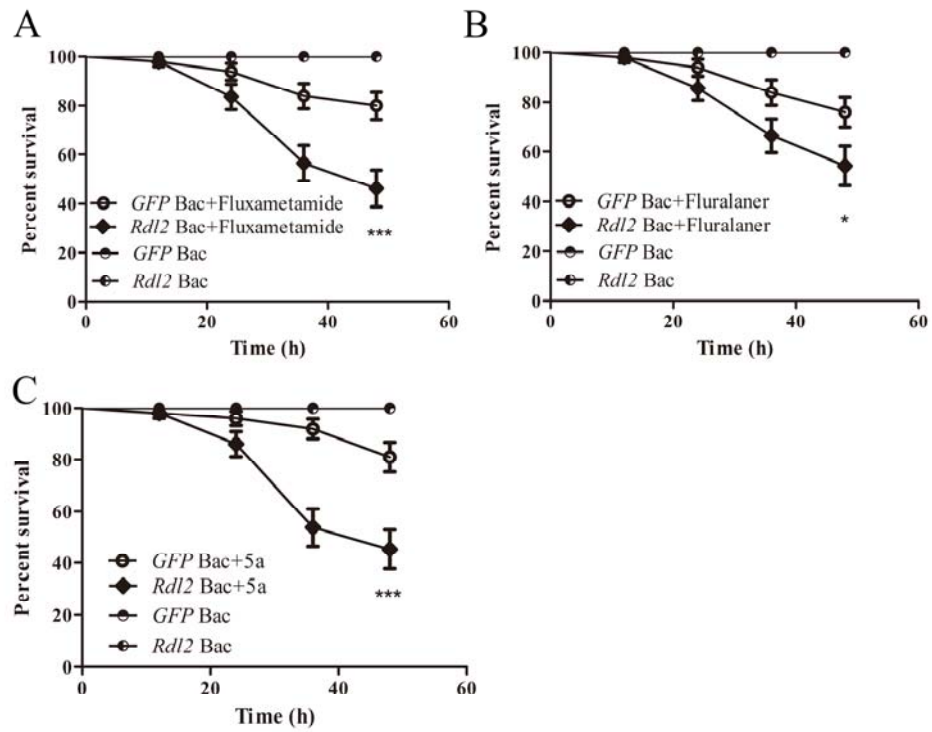

Source: https://www.biorxiv.org/content/10.1101/2021.03.24.436736v1.full.pdf
